# Supplementary material for: Ipilimumab plus nivolumab in avelumab-refractory Merkel cell carcinoma: a multicenter study of the prospective skin cancer registry ADOREG
Source: HighWire-hosted journal article supplement (doi:10.1136/jitc-2022-005930), 2022-11-01
Supplement: jitc-2022-005930supp001_data_supplement.pdf [file jitc-2022-005930supp001_data_supplement.pdf]

### Supplementary Figure Legend

**Figure 1: (a)** Waterfall plot with %-change of target lesions according to RECIST 1.1 at the time of best response. Shaded bar represents a patient who achieved a 85% reduction in target lesions but developed 3 new metastases. Red bars indicate patients treated with ipilimumab 1 mg/kg plus nivolumab 3 mg/kg. **(b)** Swimmer's plot showing individual response and follow-up of all 14 patients. CR, complete response; PR, partial response; PD, progressive disease; ICI, immune checkpoint inhibition.
