# Supplementary figures and images for: Ipilimumab plus nivolumab in avelumab-refractory Merkel cell carcinoma: a multicenter study of the prospective skin cancer registry ADOREG
Source: HighWire-hosted journal article supplement (doi:10.1136/jitc-2022-005930), 2022-11-01

(a)

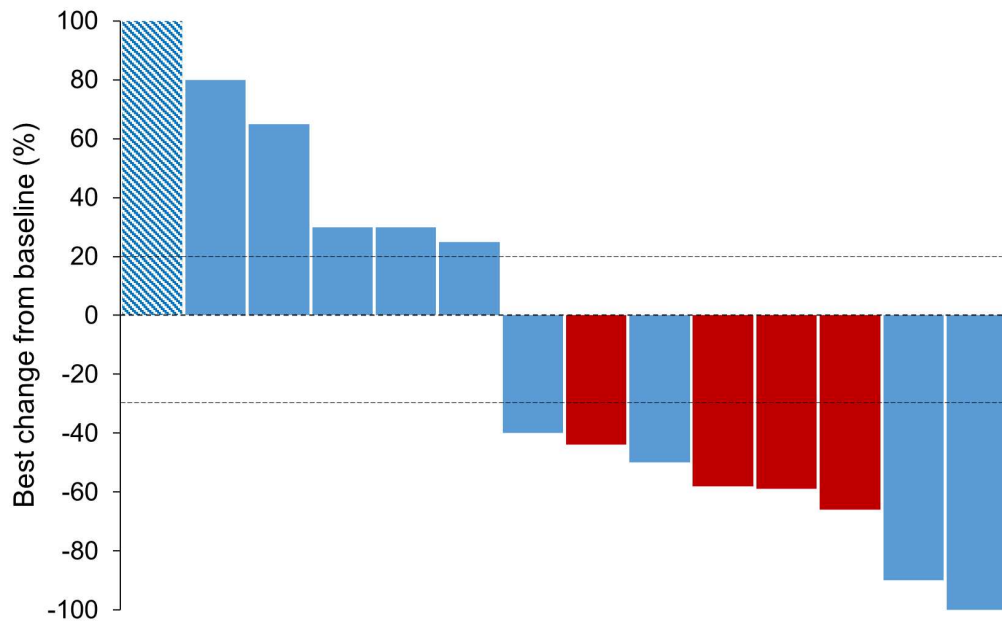

(b)

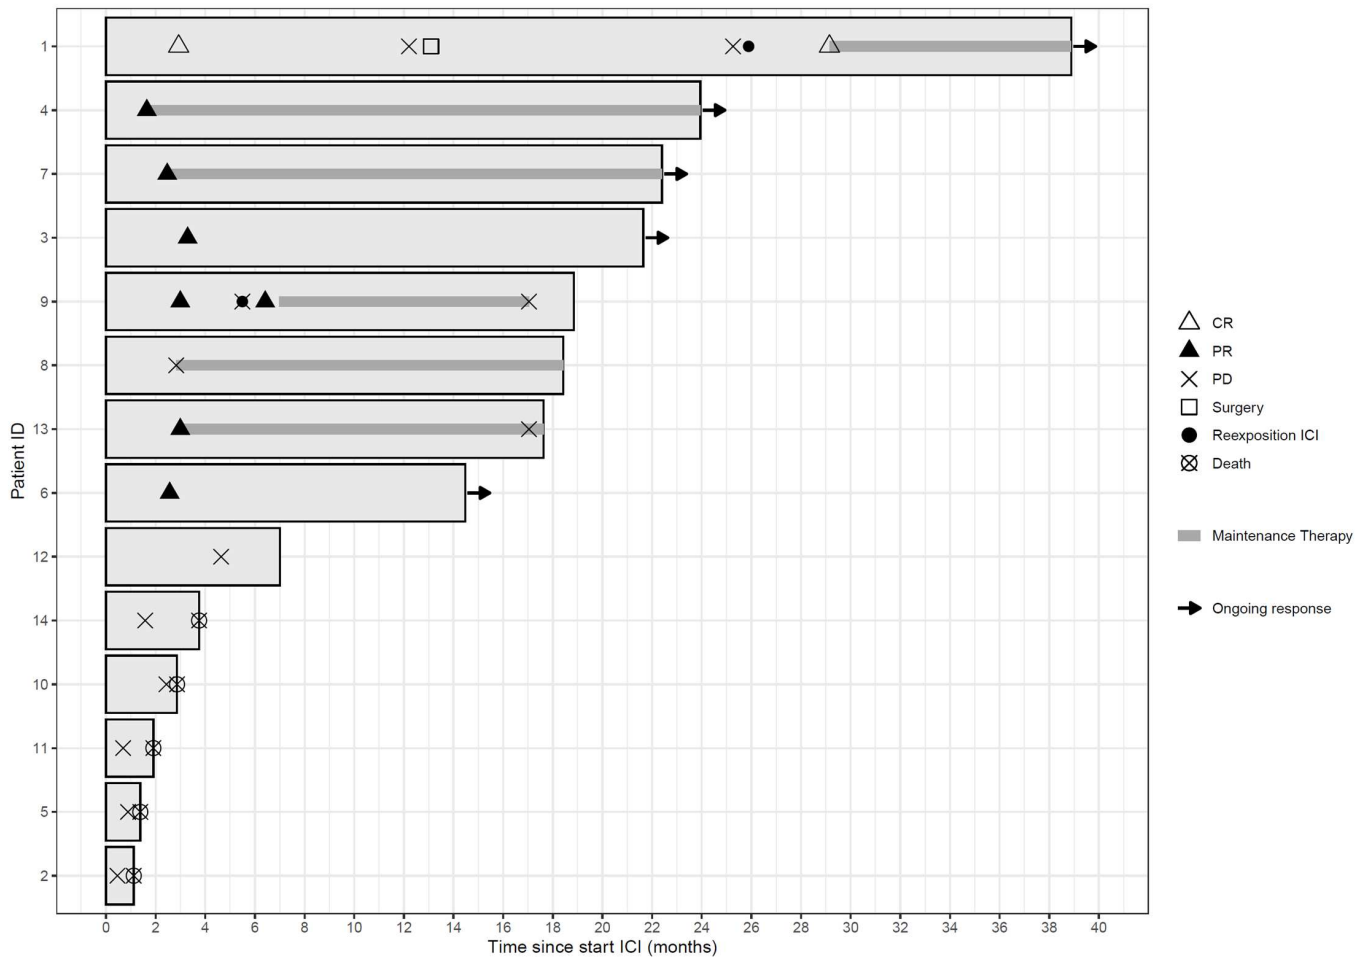

Supplementary Figure 1

Supplement: jitc-2022-005930supp002_data_supplement.pdf [file jitc-2022-005930supp002_data_supplement.pdf]
